# Supplementary material for: Engagement of CD99 Reduces AP-1 Activity by Inducing BATF in the Human Multiple Myeloma Cell Line RPMI8226
Source: PubMed Central journal article supplement — Immune Netw. 2015 Oct 26;15(5):260–7. doi: 10.4110/in.2015.15.5.260 (PMC4637347; doi:10.4110/in.2015.15.5.260), 2015-10-26
Supplement: in-15-260-s001.pdf [file in-15-260-s001.pdf]

**Table S1.** Primers used for the real-time PCR

| Gene  | Forward Primer                  | Reverse Primer                  |
|-------|---------------------------------|---------------------------------|
| BATF  | 5'- AGCGAAGACCTGGAGAAACA -3'    | 5'- TTCAGCACCGACGTGAAGTA -3'    |
| Jun   | 5'- TCGACATGGAGTCCCAGGA -3'     | 5'- GGCATTCTCTCCAGCTTCC -3'     |
| JunB  | 5'- ATGGAACAGCCCTTCTACCACG -3'  | 5'- AGGCTCGGTTTCAGGAGTTTG -3'   |
| Fos   | 5'- TGCCTCTCCTCAATGACCCTGA -3'  | 5'- ATAGGTCCATGTCTGGCACGGA -3'  |
| FosB  | 5'- AGCAGCAGCTAAATGCAGGA -3'    | 5'- TTTTGGAGCTCGGCGATCT -3'     |
| CCND1 | 5'- TGGGTCTGTGCATTTCTGGTT -3'   | 5'- GCTGGAAACAGTCCGGTTAC -3'    |
| CCND2 | 5'- TGGAGCTGCTGTGCCACG -3'      | 5'- GTGGCCACCATTCTGCGC -3'      |
| CCND3 | 5'- TTGAGCTTCCCTAGGACCAG -3'    | 5'- TGACCATCGAAAACTGTGC -3'     |
| S18   | 5'- TTTGCGAGTACTCAACACCAACA -3' | 5'- CCTCTTGGTGAGGTCAATGTCTG -3' |
