# Supplementary material for: Engagement of CD99 Reduces AP-1 Activity by Inducing BATF in the Human Multiple Myeloma Cell Line RPMI8226
Source: PubMed Central journal article supplement — Immune Netw. 2015 Oct 26;15(5):260–7. doi: 10.4110/in.2015.15.5.260 (PMC4637347; doi:10.4110/in.2015.15.5.260), 2015-10-26
Supplement: in-15-260-s002.pdf [file in-15-260-s002.pdf]

**Table S2.** SiRNA sequences

| SiRNA         |           | Sequence                        |
|---------------|-----------|---------------------------------|
| BATF siRNA    | Sense     | 5'-AUCAGAUGAGUCCUGUUUGCCUU -3'  |
|               | Antisense | 5'- GGCAAACAGGACUCAUCUGAUUU -3' |
| Control siRNA | Sense     | 5'- UCGUGCCGUUCCAUCAGGUAGUU -3' |
|               | Antisense | 5'- CUACCUGAUGGAACGGCACGAUU -3' |
